# Supplementary material for: Incidence and outcomes of intrapartum-related neonatal encephalopathy in low-income and middle-income countries: a systematic review and meta-analysis
Source: PubMed Central journal article supplement — BMJ Glob Health. 2022 Dec 29;7(12):e010294. doi: 10.1136/bmjgh-2022-010294 (PMC9806096; doi:10.1136/bmjgh-2022-010294), 2022-12-29
Supplement: bmjgh-2022-010294supp002.pdf [file bmjgh-2022-010294supp002.pdf]

**Supplementary Table 3: Results of the Bias Evaluation (see following sheets for the questionnaires used)**

| Author Year                                                     | Incidence of NE    |                          |                  |                     |                       | Outcomes of NE     |                     |                     |                     |                       |                               |                     | TOTAL STARS   |                       |
|-----------------------------------------------------------------|--------------------|--------------------------|------------------|---------------------|-----------------------|--------------------|---------------------|---------------------|---------------------|-----------------------|-------------------------------|---------------------|---------------|-----------------------|
|                                                                 | Selection          |                          | Outcomes         |                     |                       | Selection          |                     | Neonatal mortality  |                     |                       | Developmental Outcomes        |                     |               |                       |
|                                                                 | Representativeness | Ascertainment of hypoxia | Assessment of NE | Length of Follow-up | Adequacy of Follow-up | Representativeness | Ascertainment of NE | Assessment of death | Length of Follow-up | Adequacy of Follow-up | Assessment of dev. disability | Length of Follow-up |               | Adequacy of Follow-up |
| <b>Incidence:</b>                                               |                    |                          |                  |                     |                       |                    |                     |                     |                     |                       |                               |                     | Max 2+3       |                       |
| Yang 2019                                                       | a*                 | a*                       | b                | b                   | d                     |                    |                     |                     |                     |                       |                               |                     | 2+0           |                       |
| <b>Incidence and neonatal mortality:</b>                        |                    |                          |                  |                     |                       |                    |                     |                     |                     |                       |                               |                     | Max 2+3/2+3   |                       |
| Horn 2013                                                       | a*                 | a*                       | b                | b                   | b*                    | a*                 | b                   | a*                  | b                   | d                     |                               |                     | 2+1/1+1       |                       |
| Moshiro 2020                                                    | c                  | b                        | b                | b                   | a*                    | c                  | c                   | a*                  | c                   | a*                    |                               |                     | 0+1/0+2       |                       |
| Niaz 2021                                                       | c                  | a*                       | b                | b                   | a*                    | c                  | b                   | a*                  | b                   | a*                    |                               |                     | 1+1/0+2       |                       |
| <b>Incidence, neonatal mortality and developmental outcome:</b> |                    |                          |                  |                     |                       |                    |                     |                     |                     |                       |                               |                     | Max 2+3/2+3+3 |                       |
| Lally 2014                                                      | c                  | b                        | a*               | b                   | a*                    | c                  | b                   | a*                  | b                   | a*                    | a*                            | a*                  | c             | 0+2/0+2+2             |
| <b>Neonatal mortality:</b>                                      |                    |                          |                  |                     |                       |                    |                     |                     |                     |                       |                               |                     |               | Max 2+3               |
| Aly 2015                                                        |                    |                          |                  |                     |                       | c                  | c                   | a*                  | a*                  | a*                    |                               |                     |               | 0+3                   |
| Bharadwaj 2012                                                  |                    |                          |                  |                     |                       | c                  | b                   | a*                  | b                   | b*                    |                               |                     |               | 0+2                   |
| Biselele 2013                                                   |                    |                          |                  |                     |                       | c                  | b                   | a*                  | a*                  | d                     |                               |                     |               | 0+2                   |
| Biselele 2020                                                   |                    |                          |                  |                     |                       | c                  | b                   | a*                  | a*                  | d                     |                               |                     |               | 0+2                   |
| Biselele 2018                                                   |                    |                          |                  |                     |                       | c                  | a*                  | a*                  | b                   | b*                    |                               |                     |               | 1+2                   |
| Biselele 2014                                                   |                    |                          |                  |                     |                       | c                  | b                   | a*                  | b                   | d                     |                               |                     |               | 0+1                   |
| Bozkurt 2020                                                    |                    |                          |                  |                     |                       | c                  | b                   | a*                  | b                   | d                     |                               |                     |               | 0+1                   |
| El Shimi 2014                                                   |                    |                          |                  |                     |                       | c                  | b                   | a*                  | b                   | b*                    |                               |                     |               | 0+2                   |
| Enweronu-L 2019                                                 |                    |                          |                  |                     |                       | c                  | a*                  | a*                  | b                   | c                     |                               |                     |               | 1+1                   |
| Hassanein 2017                                                  |                    |                          |                  |                     |                       | c                  | b                   | b                   | c                   | a*                    |                               |                     |               | 0+1                   |
| Horn 2010                                                       |                    |                          |                  |                     |                       | c                  | b                   | a*                  | b                   | a*                    |                               |                     |               | 0+2                   |
| Horn 2012                                                       |                    |                          |                  |                     |                       | c                  | b                   | a*                  | b                   | a*                    |                               |                     |               | 0+2                   |
| Kinoshita 2021                                                  |                    |                          |                  |                     |                       | c                  | c                   | a*                  | b                   | c                     |                               |                     |               | 0+1                   |
| Martinez-H 2020                                                 |                    |                          |                  |                     |                       | c                  | b                   | a*                  | b                   | d                     |                               |                     |               | 0+1                   |
| Oliveira 2018                                                   |                    |                          |                  |                     |                       | c                  | c                   | a*                  | b                   | a*                    |                               |                     |               | 0+2                   |
| Onay 2021                                                       |                    |                          |                  |                     |                       | c                  | b                   | b                   | c                   | c                     |                               |                     |               | 0+0                   |
| Prashantha 2019                                                 |                    |                          |                  |                     |                       | c                  | b                   | a*                  | b                   | c                     |                               |                     |               | 0+1                   |
| Shabeer 2017                                                    |                    |                          |                  |                     |                       | c                  | b                   | a*                  | b                   | c                     |                               |                     |               | 0+1                   |
| Shrestha 2020                                                   |                    |                          |                  |                     |                       | c                  | b                   | a*                  | b                   | c                     |                               |                     |               | 0+1                   |
| Tanigasalam 2016                                                |                    |                          |                  |                     |                       | c                  | b                   | a*                  | b                   | b*                    |                               |                     |               | 0+2                   |
| Thomas 2018                                                     |                    |                          |                  |                     |                       | c                  | b                   | a*                  | b                   | c                     |                               |                     |               | 0+1                   |
| Umrans 2016                                                     |                    |                          |                  |                     |                       | c                  | b                   | a*                  | b                   | c                     |                               |                     |               | 0+1                   |
| Variante 2017                                                   |                    |                          |                  |                     |                       | c                  | b                   | b                   | c                   | c                     |                               |                     |               | 0+0                   |
| Yang & Li 2020                                                  |                    |                          |                  |                     |                       | c                  | b                   | a*                  | b                   | a*                    |                               |                     |               | 0+2                   |
| <b>Neonatal mortality and developmental outcome:</b>            |                    |                          |                  |                     |                       |                    |                     |                     |                     |                       |                               |                     |               | Max 2+3+3             |
| Aker 2021                                                       |                    |                          |                  |                     |                       | c                  | b                   | a*                  | a*                  | b*                    | a*                            | a*                  | b*            | 0+3+3                 |

|                                           |                                    |                          |                          |                                   |                                    |                                     |                                    |                  |                            |                                      |                           |                           |                                    |         |
|-------------------------------------------|------------------------------------|--------------------------|--------------------------|-----------------------------------|------------------------------------|-------------------------------------|------------------------------------|------------------|----------------------------|--------------------------------------|---------------------------|---------------------------|------------------------------------|---------|
| Catherine 2021                            |                                    |                          |                          |                                   |                                    | c                                   | b                                  | a*               | c                          | d                                    | a*                        | a*                        | b*                                 | 0+1+3   |
| Catherine 2020                            |                                    |                          |                          |                                   |                                    | c                                   | b                                  | a*               | c                          | d                                    | a*                        | a*                        | b*                                 | 0+1+3   |
| Celik 2015                                |                                    |                          |                          |                                   |                                    | c                                   | b                                  | a*               | b                          | b*                                   | a*                        | a*                        | b*                                 | 0+2+3   |
| Celik 2016                                |                                    |                          |                          |                                   |                                    | c                                   | b                                  | a*               | b                          | b*                                   | a*                        | a*                        | b*                                 | 0+2+3   |
| Das 2021                                  |                                    |                          |                          |                                   |                                    | c                                   | b                                  | a*               | a*                         | a*                                   | a*                        | a*                        | a*                                 | 0+3+3   |
| Gucuyener 2012                            |                                    |                          |                          |                                   |                                    | c                                   | b                                  | a*               | a*                         | a*                                   | a*                        | a*                        | c                                  | 0+3+2   |
| Jia 2018                                  |                                    |                          |                          |                                   |                                    | c                                   | b                                  | b                | a*                         | a*                                   | b                         | a*                        | a*                                 | 0+2+2   |
| Khuwuthyakorn 2021                        |                                    |                          |                          |                                   |                                    | c                                   | b                                  | b                | b                          | a*                                   | a*                        | a*                        | b*                                 | 0+1+3   |
| Malla 2017                                |                                    |                          |                          |                                   |                                    | c                                   | a*                                 | a*               | a*                         | b*                                   | a*                        | a*                        | a*                                 | 1+3+3   |
| Maoulainine 2017                          |                                    |                          |                          |                                   |                                    | b*                                  | c                                  | a*               | b                          | d                                    | b                         | a*                        | c                                  | 1+1+1   |
| Perez 2018                                |                                    |                          |                          |                                   |                                    | c                                   | b                                  | b                | c                          | a*                                   | a*                        | a*                        | a*                                 | 0+1+3   |
| Procianoy 2019                            |                                    |                          |                          |                                   |                                    | c                                   | b                                  | a*               | b                          | a*                                   | a*                        | a*                        | b*                                 | 0+2+3   |
| Sun 2012                                  |                                    |                          |                          |                                   |                                    | c                                   | a*                                 | a*               | a*                         | a*                                   | a*                        | a*                        | a*                                 | 1+3+3   |
| Thayyil 2021                              |                                    |                          |                          |                                   |                                    | c                                   | a*                                 | a*               | b                          | c                                    | a*                        | a*                        | c                                  | 1+1+2   |
| Valera 2015                               |                                    |                          |                          |                                   |                                    | c                                   | b                                  | a*               | a*                         | b*                                   | a*                        | a*                        | b*                                 | 0+3+3   |
| Zhou 2010                                 |                                    |                          |                          |                                   |                                    | c                                   | a*                                 | a*               | c                          | d                                    | a*                        | a*                        | c                                  | 1+1+2   |
| Zhu 2009                                  |                                    |                          |                          |                                   |                                    | c                                   | a*                                 | a*               | a*                         | c                                    | a*                        | a*                        | c                                  | 1+2+2   |
| Zou 2019                                  |                                    |                          |                          |                                   |                                    | c                                   | a*                                 | a*               | b                          | a*                                   | a*                        | a*                        | b*                                 | 1+2+3   |
| <b>Developmental outcome:</b>             |                                    |                          |                          |                                   |                                    |                                     |                                    |                  |                            |                                      |                           |                           |                                    | Max 2+3 |
| Ballot 2020                               |                                    |                          |                          |                                   |                                    | c                                   | b                                  |                  |                            |                                      | a*                        | a*                        | d                                  | 0+2     |
| Charki 2020                               |                                    |                          |                          |                                   |                                    | c                                   | b                                  |                  |                            |                                      | b                         | a*                        | c                                  | 0+1     |
| Koshy 2011                                |                                    |                          |                          |                                   |                                    | c                                   | b                                  |                  |                            |                                      | a*                        | a*                        | c                                  | 0+2     |
| Mbatha 2021                               |                                    |                          |                          |                                   |                                    | c                                   | b                                  |                  |                            |                                      | a*                        | a*                        | c                                  | 0+2     |
| Weng 2021                                 |                                    |                          |                          |                                   |                                    | c                                   | c                                  |                  |                            |                                      | a*                        | a*                        | a*                                 | 0+3     |
| <b>SUM</b>                                | a* = 2<br>b* = 0<br>c = 4<br>d = 0 | a* = 2<br>b = 4<br>c = 0 | a* = 1<br>b = 5<br>c = 0 | a* = 0<br>b = 6<br>c = 0<br>d = 2 | a* = 3<br>b* = 1<br>c = 0<br>d = 2 | a* = 1<br>b* = 1<br>c = 49<br>d = 0 | a* = 8<br>b = 37<br>c = 6<br>d = 0 | a* = 40<br>b = 6 | a* = 11<br>b = 28<br>c = 7 | a* = 17<br>b* = 9<br>c = 11<br>d = 9 | a* = 21<br>b = 3<br>c = 0 | a* = 24<br>b = 0<br>c = 0 | a* = 6<br>b* = 8<br>c = 9<br>d = 1 |         |
| <b>Reports evaluated for the question</b> |                                    | 6                        | 6                        | 6                                 | 6                                  | 6                                   | 51                                 | 51               | 46                         | 46                                   | 46                        | 24                        | 24                                 | 24      |
