# Supplementary material for: Incidence and outcomes of intrapartum-related neonatal encephalopathy in low-income and middle-income countries: a systematic review and meta-analysis
Source: PubMed Central journal article supplement — BMJ Glob Health. 2022 Dec 29;7(12):e010294. doi: 10.1136/bmjgh-2022-010294 (PMC9806096; doi:10.1136/bmjgh-2022-010294), 2022-12-29
Supplement: bmjgh-2022-010294supp004.pdf [file bmjgh-2022-010294supp004.pdf]

Supplementary Table 5: Neonatal Mortality Associated with Intrapartum-Related NE

| Author Year          | USUAL CARE      |                  |                       |                                                                                               |             |             |              |              |               |                 |                  | INTERVENTION                                                                                                                      |                  |                       |            |             |                                                                                               |              |              |               |                 |                  | Comments                             |    |  |
|----------------------|-----------------|------------------|-----------------------|-----------------------------------------------------------------------------------------------|-------------|-------------|--------------|--------------|---------------|-----------------|------------------|-----------------------------------------------------------------------------------------------------------------------------------|------------------|-----------------------|------------|-------------|-----------------------------------------------------------------------------------------------|--------------|--------------|---------------|-----------------|------------------|--------------------------------------|----|--|
|                      | Any grade cases | Any grade deaths | Any grade deaths/1000 | Gr I cases                                                                                    | Gr I deaths | Gr II cases | Gr II deaths | Gr III cases | Gr III deaths | Gr II-III cases | Gr II-III deaths | Any grade cases                                                                                                                   | Any grade deaths | Any grade deaths/1000 | Gr I cases | Gr I deaths | Gr II cases                                                                                   | Gr II deaths | Gr III cases | Gr III deaths | Gr II-III cases | Gr II-III deaths |                                      |    |  |
| Aker 2021            | 25              | 5                | 200.0                 |                                                                                               |             | 24          |              | 1            |               | 25              | 5                | 25                                                                                                                                | 2                | 80.0                  |            |             | 24                                                                                            |              | 1            |               | 25              | 2                | Sarnat grade of deaths not specified |    |  |
| Aly 2015             |                 |                  |                       |                                                                                               |             |             |              |              |               |                 |                  | 30                                                                                                                                | 5                | 166.7                 |            |             | 24                                                                                            |              | 6            |               | 30              | 5                | Sarnat grade of deaths not specified |    |  |
| Bharadwaj 2012       | 62              | 6                | 96.8                  |                                                                                               |             | 54          |              | 7            |               | 62              | 6                | 62                                                                                                                                | 3                | 48.4                  |            |             | 55                                                                                            |              | 8            |               | 62              | 3                | Sarnat grade of deaths not specified |    |  |
| Biselele 2020        |                 |                  |                       |                                                                                               |             |             |              |              |               |                 |                  | 7                                                                                                                                 | 3                | 428.6                 |            |             |                                                                                               |              |              |               | 7               | 3                |                                      |    |  |
| Biselele 2018        | 57              | 25               | 438.6                 | 30                                                                                            | 8           | 9           | 6            | 3            | 3             | 42              | 17               |                                                                                                                                   |                  |                       |            |             |                                                                                               |              |              |               |                 |                  |                                      |    |  |
| Biselele 2013        | 44              | 14               | 318.2                 | 16                                                                                            | 1           | 20          | 7            | 8            | 4             | 28              | 11               |                                                                                                                                   |                  |                       |            |             |                                                                                               |              |              |               |                 |                  |                                      |    |  |
| Biselele 2014        | 19              | 3                | 157.9                 |                                                                                               |             |             |              |              |               |                 |                  |                                                                                                                                   |                  |                       |            |             |                                                                                               |              |              |               |                 |                  |                                      |    |  |
| Bozkurt 2020         |                 |                  |                       |                                                                                               |             |             |              |              |               |                 |                  | 166                                                                                                                               | 26               | 156.6                 |            |             | 117                                                                                           |              | 49           |               | 166             | 26               | Sarnat grade of deaths not specified |    |  |
| Catherine 2021       | 84              | 29               | 345.2                 |                                                                                               |             |             |              |              |               | 84              | 29               | 78                                                                                                                                | 22               | 282.1                 |            |             |                                                                                               |              |              |               | 78              | 22               |                                      |    |  |
| Celik 2015 **        | 7               | 0                | 0.0                   | 7                                                                                             | 0           |             |              |              |               |                 |                  |                                                                                                                                   |                  |                       |            |             |                                                                                               |              |              |               |                 |                  |                                      |    |  |
| Celik 2016 **        |                 |                  |                       |                                                                                               |             |             |              |              |               |                 |                  | 29                                                                                                                                | 2                | 69.0                  |            |             | 12                                                                                            |              | 17           |               | 29              | 2                | Sarnat grade of deaths not specified |    |  |
| Das 2017             | 30              | 9                | 300.0                 |                                                                                               |             | 20          | 6            | 10           | 3             | 30              | 9                | 30                                                                                                                                | 3                | 100.0                 |            |             | 20                                                                                            | 1            | 10           | 2             | 30              | 3                |                                      |    |  |
| El Shimi 2014        | 10              | 8                | 800.0                 | Information in article Table 1 and text does not add up, mortality calculated by Table 1 only |             |             |              |              |               |                 |                  | 10                                                                                                                                | 8                | 20                    | 11         | 550.0       | Information in article Table 1 and text does not add up, mortality calculated by Table 1 only |              |              |               |                 |                  | 20                                   | 11 |  |
| Enweronu Laryea 2019 |                 |                  |                       |                                                                                               |             |             |              |              |               |                 |                  | 14                                                                                                                                | 3                | 214.3                 | 5          | 0           | 4                                                                                             | 1            | 3            | 2             | 7               | 3                |                                      |    |  |
| Gucuyener 2012       |                 |                  |                       |                                                                                               |             |             |              |              |               |                 |                  | 10                                                                                                                                | 2                | 200.0                 |            |             | 6                                                                                             | 0            | 4            | 2             | 10              | 2                |                                      |    |  |
| Hassanein 2017       | 20              | 5                | 250.0                 | 11                                                                                            | 0           |             |              |              |               | 9               | 5                | Unclear if infants received therapeutic hypothermia or not. As cooling was not mentioned we presumed that no treatment was given. |                  |                       |            |             |                                                                                               |              |              |               |                 |                  |                                      |    |  |
| Horn 2010            |                 |                  |                       |                                                                                               |             |             |              |              |               |                 |                  | 5                                                                                                                                 | 0                | 0.0                   |            |             |                                                                                               |              |              |               | 5               | 0                |                                      |    |  |
| Horn 2012            |                 |                  |                       |                                                                                               |             |             |              |              |               |                 |                  | 14                                                                                                                                | 3                | 214.3                 |            |             |                                                                                               |              |              |               | 14              | 3                | Sarnat grade of deaths not specified |    |  |
| Horn 2013            | 110             | 17               | 154.5                 |                                                                                               |             |             |              |              |               |                 |                  | Unclear if infants received therapeutic hypothermia or not. As cooling was not mentioned we presumed that no treatment was given. |                  |                       |            |             |                                                                                               |              |              |               |                 |                  |                                      |    |  |

|                    |     |    |       |     |    |    |    |    |    |    |    |       |    |    |    |    |    |                                                                                                                                                    |                                                                       |   |
|--------------------|-----|----|-------|-----|----|----|----|----|----|----|----|-------|----|----|----|----|----|----------------------------------------------------------------------------------------------------------------------------------------------------|-----------------------------------------------------------------------|---|
| Jia 2018           | 89  | 7  | 78.7  | 30  |    | 30 | 27 |    |    | 63 | 2  | 31.7  | 32 | 20 | 11 |    |    | Outcomes were not disaggregated by NE grade and 50% were mild NE cases, this study is not included in Figure 2                                     |                                                                       |   |
| Khuwuthyakorn 2021 |     |    |       |     |    |    |    |    |    | 23 | 7  | 304.3 |    | 19 | 4  | 23 | 7  | Sarnat grade of deaths not specified                                                                                                               |                                                                       |   |
| Kinoshita 2021     |     |    |       |     |    |    |    |    |    | 71 | 3  | 42.3  |    | 25 | 10 | 71 | 3  | 36 cases with inadequate record of NE grade                                                                                                        |                                                                       |   |
| Lally 2014         | 37  | 2  | 54.1  |     |    |    |    |    |    | 17 | 4  | 235.3 |    |    |    | 17 | 4  | Grade II-III based on Thompson > 5 at < 6 hrs. Sarnat Grade Day 3 was used in calculation of Grade I NE mortality and distribution of NE severity. |                                                                       |   |
| Malla 2017         | 50  | 6  | 120.0 |     |    | 26 | 24 |    |    | 50 | 6  | 120.0 |    | 24 | 26 | 50 | 6  | Sarnat grade of deaths not specified                                                                                                               |                                                                       |   |
| Maoulaine 2017     | 19  | 7  | 368.4 |     |    |    |    |    |    | 19 | 3  | 157.9 |    |    |    | 19 | 3  |                                                                                                                                                    |                                                                       |   |
| Martinez H. 2020   |     |    |       |     |    |    |    |    |    | 12 | 2  | 166.7 |    |    |    | 12 | 2  |                                                                                                                                                    |                                                                       |   |
| Moshiro 2020       | 146 | 37 | 253.4 | 113 | 11 | 16 | 9  | 17 | 17 | 33 | 26 |       |    |    |    |    |    |                                                                                                                                                    |                                                                       |   |
| Niaz 2021          | 84  | 13 | 154.8 |     |    |    |    |    |    |    |    |       |    |    |    |    |    | Due to inclusion of preterm cases <35 weeks of gestation, disaggregated data were not included.                                                    |                                                                       |   |
| Oliveira 2018      |     |    |       |     |    |    |    |    |    | 82 | 15 | 182.9 |    | 61 | 5  | 21 | 10 | 82                                                                                                                                                 | 15                                                                    |   |
| Onay 2021          |     |    |       |     |    |    |    |    |    | 34 | 5  | 147.1 | 3  | 22 | 9  | 34 | 5  | Sarnat grade of deaths not specified, all included in Figure 2 despite 3 mild cases                                                                |                                                                       |   |
| Perez 2018         |     |    |       |     |    |    |    |    |    | 53 | 15 | 283.0 |    | 15 | 38 | 53 | 15 | In text both 15 and 5+6=11 deaths are mentioned                                                                                                    |                                                                       |   |
| Prashantha 2019    |     |    |       |     |    |    |    |    |    | 51 | 2  | 39.2  |    | 57 | 5  | 51 | 2  | 11 cases were dismissed against medical advice and not included in the mortality calculation                                                       |                                                                       |   |
| Procianoy 2019     |     |    |       |     |    |    |    |    |    | 72 | 16 | 222.2 |    | 41 | 4  | 31 | 12 | 72                                                                                                                                                 | 16                                                                    |   |
| Shabeer 2017       |     |    |       |     |    |    |    |    |    | 68 | 14 | 205.9 |    | 59 | 9  | 68 | 14 | Sarnat grade of deaths not specified                                                                                                               |                                                                       |   |
| Shrestha 2020      | 20  | 7  | 350.0 |     |    |    |    |    |    |    |    |       |    |    |    |    |    | of Apgar < 7, diagggregated data on 64 additional cases were not included. Exclud                                                                  |                                                                       |   |
| Sun 2012           | 28  | 1  | 35.7  | 5   |    | 16 | 7  |    |    | 23 | 0  | 0.0   | 4  | 0  | 13 | 0  | 6  | 0                                                                                                                                                  | 19                                                                    | 0 |
|                    |     |    |       |     |    |    |    |    |    |    |    |       |    |    |    |    |    |                                                                                                                                                    | Sarnat grade of child who died in the control group was not specified |   |

|                  |             |            |              |     |    |     |    |     |    |     |     |              |    |   |      |    |     |    |                                                                                                                                               |     |
|------------------|-------------|------------|--------------|-----|----|-----|----|-----|----|-----|-----|--------------|----|---|------|----|-----|----|-----------------------------------------------------------------------------------------------------------------------------------------------|-----|
| Tanigasalam 2016 | 60          | 30         | 500.0        | 4   | 0  | 41  | 15 | 54  | 30 | 60  | 16  | 266.7        | 1  | 0 | 42   | 17 | 59  | 16 | Sarnat grade of children who died was not specified apart from "features of severe encephalopathy and refractory seizures", i.e. not mild NE. |     |
| Thayyil 2020     | 206         | 49         | 237.9        |     |    | 167 | 39 | 206 | 49 | 202 | 72  | 356.4        |    |   | 161  | 41 | 202 | 72 |                                                                                                                                               |     |
| Thomas 2018      |             |            |              |     |    |     |    |     |    | 103 | 7   | 68.0         | 3  |   | 81   | 19 | 103 | 7  | Sarnat grade of children who died was not specified. Due to low number of mild NE cases this study is included in Figure 2                    |     |
| Umran 2016       | 30          | 10         | 333.3        | 15  | 2  | 10  | 4  | 14  | 8  |     |     |              |    |   |      |    |     |    | Deaths in stage II-III were not separated                                                                                                     |     |
| Valera 2015      |             |            |              |     |    |     |    |     |    | 27  | 3   | 111.1        |    |   |      |    | 27  | 3  |                                                                                                                                               |     |
| Variante 2017    |             |            |              |     |    |     |    |     |    | 17  | 1   | 58.8         |    |   | 10   | 7  | 17  | 1  | Sarnat grade of death not specified                                                                                                           |     |
| Yang and Li 2020 | 30          | 2          | 66.7         |     |    |     |    | 30  | 2  | 62  | 2   | 32.3         |    |   |      |    | 62  | 2  |                                                                                                                                               |     |
| Zhou 2010        | 94          | 27         | 287.2        | 18  |    | 41  | 35 |     |    | 100 | 20  | 200.0        | 21 |   | 41   | 38 |     |    | As mortality outcomes were not disaggregated by NE grade and 20% were mild NE cases, this study is not included in Figure 2                   |     |
| Zhu 2009         | 82          | 3          | 36.6         |     |    | 61  | 21 | 82  | 3  | 76  | 2   | 26.3         |    |   | 47   | 29 | 76  | 2  | Sarnat grade of deaths not specified                                                                                                          |     |
| Zou 2019         | 44          | 6          | 136.4        | 7   |    | 28  | 9  |     |    | 45  | 6   | 133.3        | 8  | 0 | 29   | 8  |     |    | As mortality outcomes were not disaggregated by NE grade and nearly 20% were mild NE cases, this study is not included in Figure 2            |     |
| <b>SUM</b>       | <b>1487</b> | <b>328</b> | <b>220.6</b> | 256 | 22 | 563 | 28 | 227 | 27 | 815 | 223 | <b>169.2</b> | 77 | 0 | 1029 | 11 | 427 | 28 | 1600                                                                                                                                          | 280 |

\*second paper from same main author had same neonatal mortality data

\*\*Celik 2015 chosen for Grade I data, Celik 2016 chosen for Grade II-III data
