# Supplementary material for: Incidence and outcomes of intrapartum-related neonatal encephalopathy in low-income and middle-income countries: a systematic review and meta-analysis
Source: PubMed Central journal article supplement — BMJ Glob Health. 2022 Dec 29;7(12):e010294. doi: 10.1136/bmjgh-2022-010294 (PMC9806096; doi:10.1136/bmjgh-2022-010294), 2022-12-29
Supplement: bmjgh-2022-010294supp005.pdf [file bmjgh-2022-010294supp005.pdf]

| Supplementary Table 6: Neurodevelopmental outcomes associated with Intrapartum-Related Neonatal Encephalopathy |                                                                                                                                                                                                               |                                                                                                           | USUAL CARE |    |    |        |             |             | INTERVENTION     |        |    |    |        |             | Denominator |             |                                                                                |
|----------------------------------------------------------------------------------------------------------------|---------------------------------------------------------------------------------------------------------------------------------------------------------------------------------------------------------------|-----------------------------------------------------------------------------------------------------------|------------|----|----|--------|-------------|-------------|------------------|--------|----|----|--------|-------------|-------------|-------------|--------------------------------------------------------------------------------|
| Author (ref)                                                                                                   | Grades reported                                                                                                                                                                                               | Outcomes reported                                                                                         | Events     | N  | %  | Gr I N | Gr I events | Gr II-III N | Gr II-III events | Events | N  | %  | Gr I N | Gr I events |             | Gr II-III N | Gr II-III events                                                               |
| Aker 2021                                                                                                      | Grades II and III combined                                                                                                                                                                                    | i) death or CP with GMFCS level 3-5 or BSID-III cognitive and/or motor score <85 or blindness or deafness | 12         | 23 | 52 |        |             | 23          | 12               | 5      | 24 | 21 |        |             | 24          | 5           | denominator = children with known outcome                                      |
|                                                                                                                |                                                                                                                                                                                                               | ii) death                                                                                                 | 6          | 23 | 26 |        |             | 23          | 6                | 2      | 24 | 8  |        |             | 24          | 2           | denominator = children with known outcome                                      |
|                                                                                                                |                                                                                                                                                                                                               | iii) GMFCS level 3-5 or BSID-III cognitive and/or motor score <85 or blindness or deafness                | 6          | 17 | 35 |        |             | 17          | 6                | 3      | 22 | 14 |        |             | 22          | 3           | Denominator = children with known outcome who did not die                      |
|                                                                                                                |                                                                                                                                                                                                               | iv) BSID-III cognitive score <70                                                                          | 3          | 17 | 18 |        |             | 17          | 3                | 0      | 22 | 0  |        |             | 22          | 0           | denominator = children evaluated with BSID-III, Griffiths (n=1) or phone (n=1) |
|                                                                                                                |                                                                                                                                                                                                               | v) BSID-III cognitive score 70-84                                                                         | 3          | 17 | 18 |        |             | 17          | 3                | 2      | 22 | 9  |        |             | 22          | 2           | denominator = children evaluated with BSID-III, Griffiths (n=1) or phone (n=1) |
|                                                                                                                |                                                                                                                                                                                                               | vi) BSID-III motor score <70                                                                              | 3          | 17 | 18 |        |             | 17          | 3                | 0      | 22 | 0  |        |             | 22          | 0           | denominator = children evaluated with BSID-III, Griffiths (n=1) or phone (n=1) |
|                                                                                                                |                                                                                                                                                                                                               | vii) BSID-III motor score 70-84                                                                           | 1          | 17 | 6  |        |             | 17          | 1                | 2      | 22 | 9  |        |             | 22          | 2           | denominator = children evaluated with BSID-III, Griffiths (n=1) or phone (n=1) |
|                                                                                                                |                                                                                                                                                                                                               | viii) CP (any grade) - data also available for divided grades                                             | 3          | 17 | 18 |        |             | 17          | 3                | 1      | 22 | 5  |        |             | 22          | 1           | denominator = children evaluated with BSID-III, Griffiths (n=1) or phone (n=1) |
| Ballot 2020                                                                                                    | Excluded from Figure 3 as only examined survivors -> mortality data not available presuming that TH = grade II-III combined, CP data available disaggregated by grades but grades are not disaggregated by TH | i) death or any adverse outcome as below                                                                  | NA         |    |    |        |             |             |                  | NA     | NA |    |        |             |             |             |                                                                                |
|                                                                                                                |                                                                                                                                                                                                               | ii) death                                                                                                 | NA         |    |    |        |             |             |                  | NA     | NA |    |        |             |             |             |                                                                                |
|                                                                                                                |                                                                                                                                                                                                               | iii) any developmental delay (BSID-III motor, cognitive or language <70)                                  | NA         |    |    |        |             |             |                  | NA     | NA |    |        |             |             |             | denominator = children evaluated with BSID-III                                 |
|                                                                                                                |                                                                                                                                                                                                               | iv) BSID-III motor <70                                                                                    | 8          | 35 | 23 |        |             |             |                  | 5      | 49 | 10 |        |             | 49          | 5           | denominator = children evaluated with BSID-III                                 |
|                                                                                                                |                                                                                                                                                                                                               | v) BSID-III cognitive <70                                                                                 | 7          | 35 | 20 |        |             |             |                  | 5      | 49 | 10 |        |             | 49          | 5           | denominator = children evaluated with BSID-III                                 |
|                                                                                                                |                                                                                                                                                                                                               | vi) BSID-III language <70                                                                                 | 6          | 35 | 17 |        |             |             |                  | 2      | 49 | 4  |        |             | 49          | 2           | denominator = children evaluated with BSID-III                                 |
|                                                                                                                |                                                                                                                                                                                                               | vii) CP                                                                                                   | 8          | 35 | 23 | 14     | 1           | 21          | 7                | 5      | 49 | 10 |        |             | 49          | 5           | denominator = children evaluated with BSID-III                                 |
|                                                                                                                |                                                                                                                                                                                                               | i) combined death or moderate to severe disability                                                        | 46         | 79 | 58 |        |             | 79          | 46               | 27     | 76 | 36 |        |             | 76          | 27          | Denominator = children with known outcome                                      |
|                                                                                                                |                                                                                                                                                                                                               | ii) death                                                                                                 | 29         | 79 | 37 |        |             | 79          | 29               | 22     | 76 | 29 |        |             | 76          | 22          | Denominator = children with known outcome                                      |

|                |                                                                  |                                                                                                                                 |    |    |    |    |    |    |    |    |    |    |                                                           |
|----------------|------------------------------------------------------------------|---------------------------------------------------------------------------------------------------------------------------------|----|----|----|----|----|----|----|----|----|----|-----------------------------------------------------------|
| Catherine 2021 | Grades II and III combined                                       | iii) any moderate or severe delay (as below)                                                                                    | 17 | 50 | 34 | 50 | 17 | 5  | 54 | 9  | 54 | 5  | Denominator = children with known outcome who did not die |
|                |                                                                  | i) combined death or moderate to severe disability                                                                              | NA | NA | NA |    |    | NA | NA | NA | NA | NA | Denominator = children with known outcome                 |
|                |                                                                  | ii) death                                                                                                                       | 29 | 79 | 37 | 79 | 29 | 22 | 76 | 29 | 76 | 22 | Denominator = children with known outcome                 |
|                |                                                                  | iii) any moderate or severe delay                                                                                               | NA | NA | NA |    |    | NA | NA | NA | NA | NA | Denominator = children with known outcome who did not die |
|                |                                                                  | Excluded from Figure 3 due to lack of combined outcome, which was presented in the above report with same patients.             |    |    |    |    |    |    |    |    |    |    |                                                           |
|                |                                                                  | iii) DASII mental <70%                                                                                                          | 14 | 50 | 28 | 50 | 14 | 4  | 54 | 7  | 54 | 4  | Denominator = children with known outcome who did not die |
|                |                                                                  | iii) DASII motor <70%                                                                                                           | 17 | 50 | 34 | 50 | 17 | 5  | 54 | 9  | 54 | 5  | Denominator = children with known outcome who did not die |
|                |                                                                  | iv) hearing (abnormal BERA)                                                                                                     | 1  | 50 | 2  | 50 | 1  | 0  | 54 | 0  | 54 | 0  | Denominator = children with known outcome who did not die |
|                |                                                                  | v) vision                                                                                                                       | 1  | 50 | 2  | 50 | 1  | 0  | 54 | 0  | 54 | 0  | Denominator = children with known outcome who did not die |
| Catherine 2020 | Grades II and III combined                                       | vi) speech                                                                                                                      | 12 | 50 | 24 | 50 | 12 | 2  | 54 | 4  | 54 | 2  | Denominator = children with known outcome who did not die |
|                |                                                                  | i) combined death or moderate to severe disability as below                                                                     |    |    |    |    |    | 21 | 29 | 72 | 29 | 21 | Denominator = children with known outcome                 |
|                |                                                                  | ii) death                                                                                                                       |    |    |    |    |    | 11 | 29 | 38 | 29 | 11 | Denominator = children with known outcome                 |
|                |                                                                  | iii) Severe disability = BSID-III cognitive, language, or motor combined score <- 2 SD, total loss of vision, or cerebral palsy |    |    |    |    |    | 10 | 18 | 56 | 18 | 19 | Denominator = children with known outcome who did not die |
|                |                                                                  | iv) Neuromotor retardation (=mild disability) = BSID-III cognitive, language, or motor combined score                           |    |    |    |    |    |    |    |    |    |    | Denominator = children with known outcome who did not die |
| Celik * 2016   | Grades II and III combined                                       | -1 SD...-2 SD                                                                                                                   |    |    |    |    |    | 1  | 18 | 6  | 18 | 1  | Denominator = children with known outcome who did not die |
|                |                                                                  | i) combined death or severe disability as below                                                                                 | 0  | 7  | 0  | 7  | 0  |    |    |    |    |    | Denominator = children with known outcome                 |
|                |                                                                  | ii) death                                                                                                                       | 0  | 7  | 0  | 7  | 0  |    |    |    |    |    | Denominator = children with known outcome                 |
|                |                                                                  | iii) Severe disability = BSID-III cognitive, language, or motor combined score <- 2 SD, total loss of vision, or cerebral palsy | 0  | 7  | 0  | 7  | 0  |    |    |    |    |    | Denominator = children with known outcome who did not die |
|                |                                                                  | iv) Neuromotor retardation (=mild disability) = BSID-III cognitive, language, or motor combined score                           |    |    |    |    |    |    |    |    |    |    | Denominator = children with known outcome who did not die |
| Celik * 2015   | Grade I in usual care. Grades II-III were same patients as above | -1 SD...-2 SD                                                                                                                   | 0  | 7  | 0  | 7  | 0  |    |    |    |    |    | Denominator = children with known outcome who did not die |

|                |                                                            |                                                                                                                                  |    |    |    |                                                                                |    |    |    |          |    |    |    |                                                                      |  |
|----------------|------------------------------------------------------------|----------------------------------------------------------------------------------------------------------------------------------|----|----|----|--------------------------------------------------------------------------------|----|----|----|----------|----|----|----|----------------------------------------------------------------------|--|
|                |                                                            | disability                                                                                                                       | NA | NA |    |                                                                                | NA | NA |    |          |    |    |    |                                                                      |  |
|                |                                                            | ii) death                                                                                                                        | NA | NA |    |                                                                                | NA | NA |    |          |    |    |    |                                                                      |  |
|                | Excluded from Figure 3 as only death or DAMA available     | iii) psychomotor delay by DASII-III Grades I to III combined                                                                     | 16 | 84 | 19 | Control group included 15 % Grade I NE, but outcomes are not detailed by grade | 13 | 72 | 18 |          |    | 72 | 13 | Denominator = children with known outcome who did not die            |  |
| Charki 2020    |                                                            | iv) sensorineural disorder                                                                                                       | 24 | 84 | 29 |                                                                                | 11 | 72 | 15 |          |    | 72 | 11 | Denominator = children with known outcome who did not die            |  |
|                |                                                            | i) combined death or neurodevelopmental disability                                                                               | 18 | 30 | 60 |                                                                                | 6  | 30 | 20 | na       | na | 30 | 6  | Denominator = children with known outcome                            |  |
|                |                                                            | ii) death                                                                                                                        | 9  | 30 | 30 |                                                                                | 3  | 30 | 10 |          |    | 30 | 3  | Denominator = children with known outcome                            |  |
|                |                                                            | iii) DASII motor or mental development quotient <80%                                                                             | 9  | 21 | 43 |                                                                                | 3  | 27 | 11 |          |    | 27 | 3  | Denominator = children with known outcome who did not die            |  |
|                |                                                            | iv) Blindness = < 20/200 in both eyes                                                                                            | 7  | 21 | 33 |                                                                                | 2  | 27 | 7  |          |    | 27 | 2  | Denominator = children with known outcome who did not die            |  |
|                | II and III combined (has also segregated grade II and III) | v) Deafness = need of amplification                                                                                              | 8  | 21 | 38 |                                                                                | 3  | 27 | 11 |          |    | 27 | 3  | Denominator = children with known outcome who did not die            |  |
| Das 2017       |                                                            | vi) Seizures = abnormal EEG or need of AED                                                                                       | 18 | 21 | 86 |                                                                                | 10 | 27 | 37 |          |    | 27 | 10 | Denominator = children with known outcome who did not die            |  |
|                |                                                            | i) death or moderate to severe developmental disability                                                                          |    |    |    |                                                                                | 2  | 5  |    |          |    | 5  | 2  | Denominator = children with known outcome at > 12m                   |  |
|                |                                                            | ii) death                                                                                                                        |    |    |    |                                                                                |    |    |    |          |    |    |    |                                                                      |  |
| Gucuyener 2012 | Grades II and III combined                                 | iii) Cerebral Palsy                                                                                                              |    |    |    |                                                                                | 2  | 5  |    |          |    | 5  | 2  | Denominator = children with known outcome at > 12 m                  |  |
|                |                                                            | i) death or severe disability (unclear definition)                                                                               | NA |    |    | only reports neonatal death                                                    | NA |    |    |          |    |    |    |                                                                      |  |
|                |                                                            | ii) death                                                                                                                        | NA |    |    |                                                                                | NA |    |    |          |    |    |    |                                                                      |  |
| Jia 2018       | All grades combined                                        | iii) severe disability (unclear definition)                                                                                      | 35 | 82 | 43 |                                                                                | 16 | 61 | 26 |          |    |    |    | Denominator = children with known outcome who did not die neonatally |  |
|                |                                                            | severe disability                                                                                                                | NA |    |    |                                                                                | 17 | 20 | 85 | children |    | 20 | 17 | (including 1 child with CP who was lost between 1-                   |  |
|                |                                                            | ii) death                                                                                                                        | NA |    |    |                                                                                | 6  | 19 | 32 |          |    | 19 | 6  | Denominator = children with known outcome at 2 yrs                   |  |
|                |                                                            | i) death or severe disability (BSID-III (any domain) <70, GMFCS 3...5, severe visual impairment and profound hearing impairment) | NA |    |    |                                                                                | 16 | 17 | 94 |          |    | 19 | 16 | Denominator = children with known outcome at 2 yrs                   |  |

|                        |                                                                               |    |  |  |  |   |    |    |    |   |    |    |                                                                                                                  |                                                                                |
|------------------------|-------------------------------------------------------------------------------|----|--|--|--|---|----|----|----|---|----|----|------------------------------------------------------------------------------------------------------------------|--------------------------------------------------------------------------------|
|                        | iii) Any neurological impairment                                              | NA |  |  |  | 8 | 13 | 62 |    |   | 13 | 8  | Denominator = children with known outcome at 2 yrs incl 2 whose parents refused BSID but were reportedly healthy |                                                                                |
|                        | iv) BSID-III cognitive <70                                                    | NA |  |  |  | 4 | 11 | 36 |    |   | 11 | 4  | Denominator = children evaluated with BSID-III 2 yrs                                                             |                                                                                |
|                        | ix) BSID-III language < 70                                                    | NA |  |  |  | 4 | 11 | 36 |    |   | 11 | 4  | Denominator = children evaluated with BSID-III 2 yrs                                                             |                                                                                |
|                        | x) BSID-III motor <70                                                         | NA |  |  |  | 3 | 11 | 27 |    |   | 11 | 3  | Denominator = children evaluated with BSID-III 2 yrs                                                             |                                                                                |
|                        | iv) CP any grade                                                              | NA |  |  |  | 4 | 12 | 33 |    |   | 12 | 4  | Denominator = children evaluated with BSID-III 2 yrs + 1 known case of CP who was lost between 1 and 2 yrs       |                                                                                |
|                        | v) blindness                                                                  | NA |  |  |  | 3 | 11 | 27 |    |   | 11 | 3  | Denominator = children evaluated with BSID-III 2 yrs                                                             |                                                                                |
| Khuwuthyako<br>rn 2021 | vi) profound hearing impairment (OAE or ABR test)                             | NA |  |  |  | 0 | 11 | 0  |    |   |    |    | Denominator = children evaluated with BSID-III 2 yrs                                                             |                                                                                |
|                        | i) combined death or moderate to severe disability                            |    |  |  |  | 3 | 15 | 20 |    |   | 15 | 3  | Denominator = children with known outcome                                                                        |                                                                                |
|                        | ii) death                                                                     |    |  |  |  | 2 | 15 | 13 |    |   | 15 | 2  | Denominator = children with known outcome                                                                        |                                                                                |
|                        | iii) neurodevelopmental disability (Griffiths and Vineland, unclear cut-offs) |    |  |  |  | 1 | 13 | 8  |    |   | 13 | 1  | Denominator = children with known outcome who did not die                                                        |                                                                                |
| Koshy 2011             | iv) CP                                                                        | NA |  |  |  | 1 | 13 | 8  |    |   | 13 | 1  | Denominator = children with known outcome who did not die                                                        |                                                                                |
|                        | Outcomes i-iii reported separate for NT and TH                                |    |  |  |  | 8 | 37 | 22 | 37 | 8 | 6  | 16 | 38                                                                                                               | as these children were cooled, we presume they were in Grade II-III            |
|                        | ii) death                                                                     |    |  |  |  | 2 | 28 | 7  | 28 | 2 | 4  | 17 | 24                                                                                                               | Denominator = children with known outcome. 2 additional cases had microcephaly |
|                        | Outcomes iv-vii all reported all in usual care group                          |    |  |  |  | 1 | 26 | 4  | 38 | 3 | 2  | 16 | 13                                                                                                               | Denominator = children with known outcome                                      |
|                        | iii) cerebral palsy                                                           |    |  |  |  | 1 | 26 | 4  | 38 | 3 | 2  | 16 | 13                                                                                                               | Denominator = children with known outcome who did not die                      |
|                        | iv) visual (not correctable by glasses) or hearing impairment                 |    |  |  |  | 1 | 26 | 4  | 38 | 1 |    |    |                                                                                                                  | Denominator = children with known outcome who did not die                      |
|                        | v) seizures and/or use of AED                                                 |    |  |  |  | 3 | 26 | 12 | 38 | 3 |    |    |                                                                                                                  | Denominator = children with known outcome who did not die                      |
|                        | vi) head growth < -2 SD                                                       |    |  |  |  | 9 | 26 | 35 | 38 | 9 |    |    |                                                                                                                  | Denominator = children with known outcome who did not die                      |

|            |                                                                                           |                                                                                                                                                                                                                                |    |    |    |    |    |    |    |    |    |    |                                                           |
|------------|-------------------------------------------------------------------------------------------|--------------------------------------------------------------------------------------------------------------------------------------------------------------------------------------------------------------------------------|----|----|----|----|----|----|----|----|----|----|-----------------------------------------------------------|
| Lally 2014 | Grade II-III based on Thompson >5 within 6 hrs. Also has data on each Sarnat grade Day 3. | vii) composite motor score <82 or composite cognitive score <85 on BSID-III                                                                                                                                                    | 3  | 26 | 12 | 38 | 3  |    |    |    |    |    | Denominator = children with known outcome who did not die |
|            |                                                                                           | *Severe disability: GMFCS grade 3 to 5, hearing impairment requiring hearing aids, bilateral cortical visual impairment with no useful vision or BSID- i) death or moderate* or severe II Mental Development <70. disability** | 35 | 50 | 70 | 50 | 35 | 20 | 50 | 40 | 50 | 20 | Denominator = children with known outcome                 |
|            |                                                                                           | **Moderate disability: BSID-II Mental Developmental 70...84 and any one of the following: GMFCS grade 2, hearing impairment with no amplification, or persistent seizure disorder                                              |    |    |    |    |    |    |    |    |    |    |                                                           |
|            |                                                                                           | ii) death                                                                                                                                                                                                                      | 8  | 50 | 16 | 50 | 8  | 8  | 50 | 16 | 50 | 8  | Denominator = children with known outcome                 |
|            |                                                                                           | iii) any disability                                                                                                                                                                                                            | 15 | 42 | 36 | 42 | 15 | 12 | 42 | 29 | 42 | 12 | Denominator = children with known outcome who did not die |
|            |                                                                                           | iv) CP                                                                                                                                                                                                                         | 19 | 42 | 45 | 42 | 19 | 10 | 42 | 24 | 42 | 10 | Denominator = children with known outcome who did not die |
|            |                                                                                           | v) hearing impairment requiring amplification                                                                                                                                                                                  | 2  | 42 | 5  | 42 | 2  | 2  | 42 | 5  | 42 | 2  | Denominator = children with known outcome who did not die |
|            |                                                                                           | vii) seizures requiring AED                                                                                                                                                                                                    | 17 | 42 | 40 | 42 | 17 | 8  | 42 | 19 | 42 | 8  | Denominator = children with known outcome who did not die |
|            |                                                                                           | vii) BSID-II mental <70                                                                                                                                                                                                        | 15 | 40 | 38 | 40 | 15 | 8  | 40 | 20 | 40 | 8  | Denominator = children who completed BSID-II              |
|            |                                                                                           | iiiv) BSID-II mental 70-84                                                                                                                                                                                                     | 6  | 40 | 15 | 40 | 6  | 5  | 40 | 13 | 40 | 5  | Denominator = children who completed BSID-II              |
|            |                                                                                           | ix) BSID-II psychomotor <70                                                                                                                                                                                                    | 15 | 40 | 38 | 40 | 15 | 9  | 40 | 23 | 40 | 9  | Denominator = children who completed BSID-II              |
| Malla 2017 | Grade II-III combined, separate for outcome i)                                            | x) BSID-II psychomotor 70-84                                                                                                                                                                                                   | 5  | 40 | 13 | 40 | 5  | 4  | 40 | 10 | 40 | 4  | Denominator = children who completed BSID-II              |
|            |                                                                                           | i) death or any neurodevelopmental disorder                                                                                                                                                                                    | 13 | 18 | 72 | 18 | 13 | 7  | 16 | 44 | 16 | 7  | Denominator = children with known outcome                 |

|                    |                            |                                                                                                                                                                                  |                                             |    |    |    |    |   |    |    |    |    |                                                           |                                                                                                    |                                                                        |                                                                        |
|--------------------|----------------------------|----------------------------------------------------------------------------------------------------------------------------------------------------------------------------------|---------------------------------------------|----|----|----|----|---|----|----|----|----|-----------------------------------------------------------|----------------------------------------------------------------------------------------------------|------------------------------------------------------------------------|------------------------------------------------------------------------|
| Maoulainine 2017 † | Grades II and III combined | Excluded from Figure 3 because of non-standard outcome definition                                                                                                                | ii) death                                   | 7  | 18 | 39 | 18 | 7 | 4  | 16 | 25 | 16 | 4                                                         | Denominator = children with known outcome                                                          |                                                                        |                                                                        |
|                    |                            | iii) psychomotor delay                                                                                                                                                           | 2                                           | 11 | 18 | 11 | 2  | 3 | 6  | 50 | 6  | 3  | Denominator = children with known outcome who did not die |                                                                                                    |                                                                        |                                                                        |
|                    |                            | iv) epilepsy                                                                                                                                                                     | 1                                           | 11 | 9  | 11 | 1  | 1 | 6  | 17 | 6  | 1  | Denominator = children with known outcome who did not die |                                                                                                    |                                                                        |                                                                        |
|                    |                            | v) neurosensory problem                                                                                                                                                          | 3                                           | 11 | 27 | 11 | 3  | 1 | 6  | 17 | 6  | 1  | Denominator = children with known outcome who did not die |                                                                                                    |                                                                        |                                                                        |
| Mbatha 2020        | Grades II and III combined | Excluded from Figure 3 due to lack of mortality data                                                                                                                             | i) death or moderate to severe disability   |    |    |    |    |   | NA |    |    |    |                                                           |                                                                                                    |                                                                        |                                                                        |
|                    |                            | ii) death                                                                                                                                                                        |                                             |    |    |    |    |   | NA |    |    |    |                                                           |                                                                                                    |                                                                        |                                                                        |
|                    |                            | iii) Moderate to severe disability by GMDS                                                                                                                                       |                                             |    |    |    |    |   | 18 | 56 |    |    |                                                           | Denominator = children with known outcome at 18-24m who did not die. Reports also outcome at 12 m. |                                                                        |                                                                        |
| Perez 2018         | Grades II and III combined | i) death or severe developmental disability (CP, BSID-II mental development index ≤ 70, blindness, hearing impairment requiring a hearing aid and a persistent seizure disorder) |                                             |    |    |    |    |   | 22 | 53 | 42 | 53 | 22                                                        | denominator = children with known outcome                                                          |                                                                        |                                                                        |
|                    |                            |                                                                                                                                                                                  | ii) death                                   |    |    |    |    |   | 15 | 53 | 28 | 53 | 15                                                        | denominator = children with known outcome                                                          |                                                                        |                                                                        |
|                    |                            | iii) severe developmental disability (CP, BSID-II mental development index ≤ 70, blindness, hearing impairment requiring a hearing aid and a persistent seizure disorder)        |                                             |    |    |    |    |   |    |    | 7  | 38 | 18                                                        | 38                                                                                                 | 7                                                                      | Denominator = children with known outcome at 18 months who did not die |
|                    |                            |                                                                                                                                                                                  | iv) CP                                      |    |    |    |    |   |    |    | 4  | 38 | 11                                                        | 38                                                                                                 | 4                                                                      | Denominator = children with known outcome at 18 months who did not die |
|                    |                            |                                                                                                                                                                                  | v) hearing impairment requiring hearing aid |    |    |    |    |   |    |    | 3  | 38 | 8                                                         | 38                                                                                                 | 3                                                                      | Denominator = children with known outcome at 18 months who did not die |
|                    |                            | vi) Blindness                                                                                                                                                                    |                                             |    |    |    |    |   |    | 2  | 38 | 5  | 38                                                        | 2                                                                                                  | Denominator = children with known outcome at 18 months who did not die |                                                                        |
|                    |                            | vii) persistent seizures                                                                                                                                                         |                                             |    |    |    |    |   |    | 1  | 38 | 3  | 38                                                        | 1                                                                                                  | Denominator = children with known outcome at 18 months who did not die |                                                                        |

|                |                                                           |                                                                                                                   |                                                                                          |    |    |    |    |    |   |    |                                                                                                                              |                                                                                                                          |    |                                                           |
|----------------|-----------------------------------------------------------|-------------------------------------------------------------------------------------------------------------------|------------------------------------------------------------------------------------------|----|----|----|----|----|---|----|------------------------------------------------------------------------------------------------------------------------------|--------------------------------------------------------------------------------------------------------------------------|----|-----------------------------------------------------------|
| Procianoy 2019 | Grade II-III combined (reports separate grade II and III) | i) death or moderate to severe neurodevelopmental delay (BSID-III <85 or hearing impairment or visual impairment) |                                                                                          |    |    |    |    |    |   |    | numerator = 16 deaths + 18 abnormal BSID + 3 blind/deaf. Denominator = children with known outcome = 72-13 lost to follow-up |                                                                                                                          |    |                                                           |
|                |                                                           | ii) death                                                                                                         |                                                                                          |    |    |    |    |    |   |    | denominator = children with known outcome                                                                                    |                                                                                                                          |    |                                                           |
|                |                                                           | iii) any neurodevelopmental delay (as defined above)                                                              |                                                                                          |    |    |    |    |    |   |    |                                                                                                                              | who attended could not be evaluated because of blindness or deafness)                                                    |    |                                                           |
|                |                                                           | iv) motor score <85                                                                                               |                                                                                          |    |    |    |    |    |   |    |                                                                                                                              | denominator = those with BSID-III done (3 children who attended could not be evaluated because of blindness or deafness) |    |                                                           |
|                |                                                           | v) language score <85                                                                                             |                                                                                          |    |    |    |    |    |   |    |                                                                                                                              | denominator = those with BSID-III done (3 children who attended could not be evaluated because of blindness or deafness) |    |                                                           |
|                |                                                           | vi) cognitive score <85                                                                                           |                                                                                          |    |    |    |    |    |   |    |                                                                                                                              | denominator = those with BSID-III done (3 children who attended could not be evaluated because of blindness or deafness) |    |                                                           |
|                |                                                           | iv) microcephaly                                                                                                  |                                                                                          |    |    |    |    |    |   |    |                                                                                                                              | Denominator = children with known outcome who did not die                                                                |    |                                                           |
| Procianoy 2019 | Grade II-III combined (reports separate grade II and III) | v) hearing impairment                                                                                             |                                                                                          |    |    |    |    |    |   |    | Denominator = children with known outcome who did not die                                                                    |                                                                                                                          |    |                                                           |
|                |                                                           | vi) visual impaired                                                                                               |                                                                                          |    |    |    |    |    |   |    | Denominator = children with known outcome who did not die                                                                    |                                                                                                                          |    |                                                           |
| Sun 2012       | Grade II-III combined, but 20% Grade I                    | Excluded from Figure 3 and 4 due to mixing grade I and II-III, also only severe disability reported.              | i) death or severe developmental delay BSID-III mental or physical development index <70 | 18 | 28 | 64 | na | na | 7 | 23 | 30                                                                                                                           | na                                                                                                                       | na | denominator = children with known outcome                 |
|                |                                                           |                                                                                                                   | ii) death                                                                                | 1  | 28 | 4  |    |    | 0 | 23 | 0                                                                                                                            |                                                                                                                          |    | denominator = children with known outcome                 |
|                |                                                           |                                                                                                                   | iii) developmental delay BSID-III mental or physical development index <70               | 17 | 27 | 63 |    |    | 7 | 23 | 30                                                                                                                           |                                                                                                                          |    | Denominator = children with known outcome who did not die |
|                |                                                           |                                                                                                                   | iv) BSID-III mental development index <70                                                | 13 | 27 | 48 |    |    | 5 | 23 | 22                                                                                                                           |                                                                                                                          |    | Denominator = children with known outcome who did not die |
|                |                                                           |                                                                                                                   | v) BSID-III physical development index <70                                               | 12 | 27 | 44 |    |    | 5 | 23 | 22                                                                                                                           |                                                                                                                          |    | Denominator = children with known outcome who did not die |
|                |                                                           |                                                                                                                   | vi) CP                                                                                   | 3  | 27 | 11 |    |    | 2 | 23 | 9                                                                                                                            |                                                                                                                          |    | Denominator = children with known outcome who did not die |

|                                                                                                                                                         |                                                                                                                                                         |                        |     |     |    |    |     |     |    |     |     |     |     |                                                                |                                                           |
|---------------------------------------------------------------------------------------------------------------------------------------------------------|---------------------------------------------------------------------------------------------------------------------------------------------------------|------------------------|-----|-----|----|----|-----|-----|----|-----|-----|-----|-----|----------------------------------------------------------------|-----------------------------------------------------------|
| (Severe disability: BSID-III cognitive score <70, GMFCS 3...5, profound hearing impairment requiring hearing aids or a cochlear implant, or blindness.) | i) death or moderate to severe disability                                                                                                               | 94                     | 199 | 47  | na | na | 199 | 94  | 98 | 195 | 50  | 195 | 98  | denominator = children with known outcome                      |                                                           |
|                                                                                                                                                         | ii) death                                                                                                                                               | 63                     | 201 | 31  |    |    | 201 | 63  | 84 | 198 | 42  | 198 | 84  | denominator = children with known outcome                      |                                                           |
|                                                                                                                                                         | iii) Severe disability                                                                                                                                  | 28                     | 136 | 21  |    |    | 136 | 28  | 14 | 112 | 13  | 112 | 14  | Denominator = children with known outcome who did not die      |                                                           |
|                                                                                                                                                         | Moderate disability                                                                                                                                     | 3                      | 135 | 2   |    |    | 135 | 3   | 0  | 111 | 0   | 111 | 0   | Denominator = children with known outcome who did not die      |                                                           |
|                                                                                                                                                         | BSID-III cognitive score 70-84 and one or more of the following: GMFCS 2, a hearing impairment with no amplification, or a persistent seizure disorder) | 23                     | 135 | 17  |    |    | 135 | 23  | 19 | 110 | 17  | 110 | 19  | Denominator = children with known outcome who did not die      |                                                           |
|                                                                                                                                                         | vi) BSID-III cognitive score 70-84                                                                                                                      | 22                     | 133 | 17  |    |    | 133 | 22  | 25 | 108 | 23  | 108 | 25  | Denominator = children with known outcome who did not die      |                                                           |
|                                                                                                                                                         | vii) BSID-III cognitive score <70                                                                                                                       | 24                     | 133 | 18  |    |    | 133 | 24  | 11 | 108 | 10  | 108 | 11  | Denominator = children with known outcome who did not die      |                                                           |
|                                                                                                                                                         | viii) BSID-III motor score 70-84                                                                                                                        | 7                      | 133 | 5   |    |    | 133 | 7   | 6  | 108 | 6   | 108 | 6   | Denominator = children with known outcome who did not die      |                                                           |
|                                                                                                                                                         | ix) BSID-III motor score <70                                                                                                                            | 26                     | 133 | 20  |    |    | 133 | 26  | 11 | 108 | 10  | 108 | 11  | Denominator = children with known outcome who did not die      |                                                           |
|                                                                                                                                                         | x) BSID-III language score 70-84                                                                                                                        | 47                     | 133 | 35  |    |    | 133 | 47  | 29 | 108 | 27  | 108 | 29  | Denominator = children with known outcome who did not die      |                                                           |
|                                                                                                                                                         | xi) BSID-III language score <70                                                                                                                         | 27                     | 133 | 20  |    |    | 133 | 27  | 18 | 108 | 17  | 108 | 18  | Denominator = children with known outcome who did not die      |                                                           |
|                                                                                                                                                         | xii) persistent seizures                                                                                                                                | 9                      | 133 | 7   |    |    | 133 | 9   | 3  | 111 | 3   | 111 | 3   | Denominator = children with known outcome who did not die      |                                                           |
|                                                                                                                                                         | Microcephaly removed                                                                                                                                    | xiii) CP (GMFCS 2..5)  | 28  | 136 | 21 |    |     | 136 | 28 | 12  | 111 | 11  | 111 | 12                                                             | Denominator = children with known outcome who did not die |
|                                                                                                                                                         | xiv) Blindness                                                                                                                                          | 10                     | 135 | 7   |    |    | 135 | 10  | 5  | 111 | 5   | 111 | 5   | Denominator = children with known outcome who did not die      |                                                           |
|                                                                                                                                                         | Grades II and III combined                                                                                                                              | xv) Hearing impairment | 6   | 136 | 4  |    |     | 136 | 6  | 3   | 112 | 3   | 112 | 3                                                              | Denominator = children with known outcome who did not die |
| Thayil 2021                                                                                                                                             | i) death or severe neurodevelopmental disorder (any BSID-III < 70)                                                                                      |                        |     |     |    |    |     |     | 6  | 19  | 32  | 19  | 6   | denominator = children with known outcome                      |                                                           |
|                                                                                                                                                         | ii) death                                                                                                                                               |                        |     |     |    |    |     |     | 3  | 19  | 16  | 19  | 3   | denominator = children with known outcome                      |                                                           |
|                                                                                                                                                         | iii) severe motor disorder BSID-III <70                                                                                                                 |                        |     |     |    |    |     |     | 1  | 13  | 8   |     |     | denominator = children >1yr with known outcome who did not die |                                                           |



|             |                                                                                                                  |    |    |    |    |   |    |    |    |     |    |    |    |    |    |                                                                                       |
|-------------|------------------------------------------------------------------------------------------------------------------|----|----|----|----|---|----|----|----|-----|----|----|----|----|----|---------------------------------------------------------------------------------------|
|             | iv) moderate motor disorder BSID 70-84                                                                           |    |    |    |    |   |    |    | 1  | 13  | 8  |    |    |    |    | denominator = children >1yr with known outcome who did not die                        |
|             | v) severe language develop                                                                                       |    |    |    |    |   |    |    | 2  | 13  | 15 |    |    |    |    | denominator = children >1yr with known outcome who did not die                        |
|             | vi) moderate language dev                                                                                        |    |    |    |    |   |    |    | 3  | 13  | 23 |    |    |    |    | denominator = children >1yr with known outcome who did not die                        |
|             | vii) severe cognitive                                                                                            |    |    |    |    |   |    |    | 0  | 13  | 0  |    |    |    |    | denominator = children >1yr with known outcome who did not die                        |
| Valera 2017 | Grades II and III combined<br>viii) moderate cognitive                                                           | NA |    |    |    |   |    |    | 1  | 13  | 8  |    | 16 | 3  |    | denominator = children >1yr with known outcome who did not die                        |
| Zhou 2010   | All NE grades. (has data on separate)                                                                            |    |    |    |    |   |    |    |    |     |    |    |    |    |    |                                                                                       |
|             | i) death or severe disability (GMFCS 3-5 or GCDAS <70)                                                           | 46 | 94 | 49 | 18 | 0 | 76 | 46 | 31 | 100 | 31 | 21 | 0  | 79 | 31 | denominator = children with known outcome                                             |
|             | ii) death                                                                                                        | 27 | 94 | 29 | 18 | 0 | 76 | 27 | 20 | 100 | 20 | 21 | 0  | 79 | 20 | denominator = children with known outcome                                             |
|             | iii) severe disability (GMFCS 3-5 or GCDAS <70)                                                                  | 19 | 67 | 28 | 18 | 0 | 49 | 19 | 11 | 80  | 14 | 21 | 0  | 59 | 11 | Denominator = children with known outcome who did not die                             |
|             | iv) GCDAS <70                                                                                                    | 13 | 63 | 21 | 15 | 0 | 48 | 13 | 4  | 75  | 5  | 19 | 0  | 56 | 4  | Denominator = children with known outcome who did not die                             |
|             | v) GCDAS 70-84                                                                                                   | 17 | 63 | 27 | 15 | 7 | 48 | 10 | 23 | 75  | 31 | 19 | 6  | 56 | 17 | Denominator = children with known outcome who did not die                             |
|             | vi) cerebral palsy                                                                                               | 19 | 67 | 28 |    |   | NA | NA | 10 | 80  | 13 |    |    | NA | NA | Denominator = children with known outcome who did not die. NE grade of cases unknown. |
| Zhu 2009    | Grades II and III combined and separated                                                                         |    |    |    |    |   |    |    |    |     |    |    |    |    |    |                                                                                       |
|             | i) death or moderate to severe disability (CP GMFCS 3...5, severe hearing loss, blindness, and BSID-II MDI < 70) | 35 | 80 | 44 |    |   | 80 | 35 | 18 | 73  | 25 |    |    | 73 | 18 | denominator = children with known outcome                                             |
|             | ii) death                                                                                                        | 4  | 80 | 5  |    |   | 80 | 4  | 3  | 73  | 4  |    |    | 73 | 3  | denominator = children with known outcome                                             |
|             | iii) CP                                                                                                          | 14 | 76 | 18 |    |   | 76 | 14 | 5  | 70  | 7  |    |    | 70 | 5  | Denominator = children with known outcome who did not die                             |
|             | iv) MDI <70                                                                                                      | 17 | 76 | 22 |    |   | 70 | 7  | 7  | 70  | 10 |    |    | 70 | 7  | Denominator = children with known outcome who did not die                             |
| Zou 2019    | Excluded from Figures 3 and 4 because of 16% mild NE                                                             |    |    |    |    |   |    |    |    |     |    |    |    |    |    |                                                                                       |
|             | i) death or abnormal neurodevelopmental outcome (BSID-III cognitive or motor score <85)                          | 26 | 42 | 62 |    |   | na | na | 16 | 44  | 36 |    |    | na | na | denominator = children with known outcome                                             |
|             | ii) death                                                                                                        | 6  | 42 | 14 |    |   |    |    | 6  | 44  | 14 |    |    |    |    | denominator = children with known outcome                                             |
|             | iii) abnormal neurodevelopment (BSID-III cognitive or motor score <85)                                           | 20 | 36 | 56 |    |   |    |    | 10 | 38  | 26 |    |    |    |    | Denominator = children with known outcome who did not die                             |

|             |                                                                                                                                                                                              |            |            |           |    |    |            |            |           |    |   |                                                           |
|-------------|----------------------------------------------------------------------------------------------------------------------------------------------------------------------------------------------|------------|------------|-----------|----|----|------------|------------|-----------|----|---|-----------------------------------------------------------|
|             | i) death or severe disability (BSID-II MDI < 70, GMFCS 3 to 5, hearing impairment requiring hearing aids, or blindness)                                                                      | 10         | 25         | 40        | 25 | 10 | 2          | 36         | 6         | 36 | 2 | denominator = children with known outcome                 |
|             | ii) death                                                                                                                                                                                    | 4          | 25         | 16        | 25 | 4  | 0          | 36         | 0         | 36 | 0 | denominator = children with known outcome                 |
| Weng 2021   | Grades II and III combined iii) severe disability                                                                                                                                            | 6          | 21         | 29        | 21 | 6  | 2          | 36         | 6         | 36 | 2 | Denominator = children with known outcome who did not die |
|             | <b>SUM Combined Outcome:</b>                                                                                                                                                                 | <b>361</b> | <b>712</b> | <b>51</b> |    |    | <b>351</b> | <b>883</b> | <b>40</b> |    |   |                                                           |
|             | <b>SUM CP:</b>                                                                                                                                                                               | <b>95</b>  | <b>426</b> | <b>22</b> |    |    | <b>56</b>  | <b>476</b> | <b>12</b> |    |   |                                                           |
|             | BSID = Bayley Scales of Infant Development                                                                                                                                                   |            |            |           |    |    |            |            |           |    |   |                                                           |
|             | CP = Cerebral Palsy                                                                                                                                                                          |            |            |           |    |    |            |            |           |    |   |                                                           |
|             | DAMA = discharge against medical advice                                                                                                                                                      |            |            |           |    |    |            |            |           |    |   |                                                           |
|             | DASII = Developmental Assessment Scale for Indian Infants                                                                                                                                    |            |            |           |    |    |            |            |           |    |   |                                                           |
|             | EEG = electroencephalography                                                                                                                                                                 |            |            |           |    |    |            |            |           |    |   |                                                           |
|             | GCDAS = Griffiths Scales of Developmental Assessment                                                                                                                                         |            |            |           |    |    |            |            |           |    |   |                                                           |
|             | MDI = Mental Development Index                                                                                                                                                               |            |            |           |    |    |            |            |           |    |   |                                                           |
|             | GMFCS = Gross Motor Function Classification Scale                                                                                                                                            |            |            |           |    |    |            |            |           |    |   |                                                           |
|             | GMDS = Griffiths Mental Development Scale                                                                                                                                                    |            |            |           |    |    |            |            |           |    |   |                                                           |
|             | SD = Standard Deviation                                                                                                                                                                      |            |            |           |    |    |            |            |           |    |   |                                                           |
|             | Additional notes:                                                                                                                                                                            |            |            |           |    |    |            |            |           |    |   |                                                           |
|             | Number of abnormal cases were calculated based on percentages provided in the article and are not the same as reported in Table 5 of the article, which does not consider loss to follow-up. |            |            |           |    |    |            |            |           |    |   |                                                           |
| † Maoulaine | 3 children were lost to follow-up and outcome for 5 was not included as they were not 1 year at time of report                                                                               |            |            |           |    |    |            |            |           |    |   |                                                           |
| ‡ Valera    |                                                                                                                                                                                              |            |            |           |    |    |            |            |           |    |   |                                                           |
|             | Usual care group group N=18, 7 died hospital, 11 were followed, 5 were normal = 6 were abnormal. Total N= 7+6+5 = 18, abnormal = 7+6 = 13                                                    |            |            |           |    |    |            |            |           |    |   |                                                           |
|             | Intervention 19, 3 died in hospital and 1 after hospital, 13 Were followed, 9 were normal = 4 were abnormal. Total N = 3+13=16, abnormal = 3+4=7                                             |            |            |           |    |    |            |            |           |    |   |                                                           |
